# Supplementary material for: Recombinant Mitochondrial Genomes Reveal Recent Interspecific Hybridization between Invasive Salangid Fishes
Source: MDPI journal article supplement (doi:10.3390/life12050661), 2022-04-29
Supplement: s1 [file s1]

Text S3. Alignment of variable nucleotide sites of the *Protosalanx chinensis* (HM106494, MW291629) and *Neosalanx anderssoni* (HM106492) full mitochondrial genomes, showing evidence of recombination at the *ND5* genes.

|                                 |             |            |            |            |            |              |             |            |        |
|---------------------------------|-------------|------------|------------|------------|------------|--------------|-------------|------------|--------|
| [                               |             | 111111     | 1111111111 | 1111122222 | 2222222222 | 2222333333   | 3333333333  | 3333333333 | 33333  |
| [                               | 124445666   | 7888023334 | 4555566688 | 8888902223 | 4466677899 | 9999000000   | 1111111112  | 2223333333 | 33334] |
| [                               | 512266024   | 6123049992 | 7123338811 | 3678424678 | 1258945845 | 7788456789   | 0145588891  | 2440244466 | 77891] |
| [                               | 4754548384  | 6383852350 | 5628937847 | 7348216883 | 2560284710 | 2403987084   | 0281747801  | 3144203914 | 09512] |
| #HM106494_Protosalanx_chinensis | GTTATATTGT  | CAGGAGGTTG | AATGACACCC | AATGATGTAG | ACAAAAACAT | TATACCGCTC   | CGATATCCTC  | GAGAGAGCAT | TACCT  |
| #HM106492_Neosalanx_anderssoni  | ACCGCGCTC   | GGAAG..ACA | GGCAGTGG.. | CGAAGCACGA | GT.GGGGTCC | CCCGAT..TCA  | AC.CGATTGT  | TCAGAGATGA | CGTTA  |
| #MW291629_Protosalanx_chinensis | ...G.....   | .G...AA... | .....AT    | .....      | ..G.....   | .....A...    | ..G.....    | .....      | .....  |
| [                               |             | 3333333333 | 3333333333 | 3333333333 | 3333333444 | 4444444444   | 4444444444  | 4444444444 | 44444] |
| [                               | 4444444555  | 5555566666 | 7777778888 | 8888999011 | 1222222223 | 3333344444   | 4455555555  | 5566666667 | 77788] |
| [                               | 2245689012  | 3788911348 | 0357990123 | 4447244923 | 9012467880 | 3678900244   | 6701134566  | 7712345563 | 66811] |
| [                               | 4754313270  | 5769579765 | 0078365198 | 1784859305 | 8138973286 | 3351328317   | 5170641017  | 0357654742 | 08946] |
| #HM106494_Protosalanx_chinensis | AAGTCCAGGA  | TAAATTAATG | TCGTAGAAGC | AGAAGATCGC | TACGTACTTA | TGGTACCGTT   | AGAACAAAAG  | TGCTTTAAAA | GAACG  |
| #HM106492_Neosalanx_anderssoni  | GGACTAGA.C  | CCGCCCGCCC | CTACGAGCAT | GAGGATCTAT | CGAACGTCCG | CAACGT..ACC  | GCGCTG..CGC | CATAGCGGGG | AGGTA  |
| #MW291629_Protosalanx_chinensis | .....A.     | .....      | ..A....C.. | ...G.....  | .....      | .....A...    | .....GC..   | .....      | .....  |
| [                               |             | 4444444445 | 5555555555 | 5555555555 | 5555555555 | 5555555556   | 6666666666  | 6666666666 | 66666] |
| [                               | 8888889990  | 0000000000 | 0000133566 | 6666777777 | 7888888888 | 8899999900   | 0000011222  | 2233333444 | 55555] |
| [                               | 3458990340  | 1115566777 | 7889157424 | 5599012245 | 7022336677 | 9011248935   | 6889912222  | 3500138779 | 34455] |
| [                               | 1888479993  | 1797989147 | 8062074597 | 3958132505 | 0617093625 | 0217019518   | 4581791369  | 5617915289 | 21403] |
| #HM106494_Protosalanx_chinensis | TCGAAAGCAG  | ACGATATACA | GCTCGTTTTA | CACACAATCA | CGACGTAATG | TTAAGAAATGT  | CGAGGTACTC  | ATTTACCTAA | CTGGT  |
| #HM106492_Neosalanx_anderssoni  | AGTGTTCATG. | GA.GCGCGTG | ATCAAAAACG | TCT..TGCTG | AAGAACTGCA | CCGCACGCAC   | TTGCACGTCT  | CCCCGTTAGG | GAAAC  |
| #MW291629_Protosalanx_chinensis | .....A      | ..A.....   | .....      | ...G.....  | .....      | CC.....      | .....       | .....      | .....  |
| [                               |             | 6666666666 | 6666666667 | 7777777777 | 7777777777 | 7777777777   | 8888888888  | 8888888888 | 88888] |
| [                               | 5555566667  | 7788888890 | 0011233334 | 4445555555 | 5666777899 | 0001111222   | 2222333333  | 3333344444 | 45555] |
| [                               | 7889934783  | 5946679902 | 3979823360 | 1780456789 | 9669125346 | 5781466001   | 2468012233  | 3456835678 | 92333] |
| [                               | 4090843383  | 1945872871 | 0366873965 | 7104354094 | 7363196155 | 6793869687   | 3783742814  | 7687501684 | 30578] |
| #HM106494_Protosalanx_chinensis | AAACTGATGT  | GGCTCAAAGT | CTATGTAGCA | GGTGTGCGAG | GCAATCCGCG | TTAACTTAAT   | TCATTTTTTA  | AATTGTCTTA | ATTTT  |
| #HM106492_Neosalanx_anderssoni  | GGGTCT..CCC | AA.CGGGGAC | TCCCACGATC | AACACCAGAG | ATGGCTTT-T | CCTCTCACGC   | CTCCCCACCG  | GGCCACTCCG | GCCGA  |
| #MW291629_Protosalanx_chinensis | .....G...   | ..T.....   | T.....     | .....G...  | ...G....T. | .....C       | .....       | .....      | ....G  |
| [                               |             |            |            |            |            |              |             |            | 1111]  |
| [                               | 8888888888  | 8888888888 | 8888899999 | 9999999999 | 9999999999 | 9999999999   | 9999999999  | 9999999999 | 90000] |
| [                               | 5555666666  | 6677777778 | 8999900011 | 1122222223 | 3333333333 | 3333444444   | 4567777888  | 8899999999 | 90000] |
| [                               | 4689000115  | 8815566891 | 3335737812 | 6701235660 | 0224777788 | 8899123366   | 7410248015  | 6800223478 | 90002] |
| [                               | 4533147038  | 2831439701 | 4671854092 | 7302404363 | 8037578923 | 4929054748   | 9565640465  | 7836489821 | 32382] |
| #HM106494_Protosalanx_chinensis | ACCTAACATA  | TAAAAGCCTC | ACCACCTACT | CCTTTGTTTG | GGGTACGCAC | GATAACTGTT</ |             |            |        |

|                                 |            |            |            |            |            |            |            |            |            |        |
|---------------------------------|------------|------------|------------|------------|------------|------------|------------|------------|------------|--------|
| [                               | 1111111111 | 1111111111 | 1111111111 | 1111111111 | 1111111111 | 1111111111 | 1111111111 | 1111111111 | 1111111111 | 111111 |
| [                               | 0000000000 | 0000000000 | 0000000000 | 0000000000 | 0000001111 | 1111111111 | 1111111111 | 1111111111 | 1111111111 | 111111 |
| [                               | 0001112222 | 2222223334 | 4444555666 | 6677777788 | 8889990000 | 0000000011 | 1111111122 | 2222222333 | 334444     |        |
| [                               | 2375890234 | 5577882344 | 4559069158 | 8900112301 | 2391892445 | 5567888901 | 4556888901 | 1334688227 | 891555     |        |
| [                               | 3347192354 | 0312032734 | 7068127801 | 5258170576 | 8732136170 | 3681369246 | 9351258730 | 5032917091 | 383581     |        |
| #HM106494_Protosalanx_chinensis | AACTAGGACG | TAACACGACA | AGGAGCAGGC | TGAGTAATAG | CCCTCGACGC | TTGCATAGTC | AATCGGTGAC | AATTGTTTAT | CTTGA      |        |
| #HM106492_Neosalanx_anderssoni  | GGTCCAATA  | GGGTGTAGTG | GAACATGACT | CCGACCGCGA | GTTCTAGTAT | ACAGCCTACA | GGCTA.CAGT | GGCCACCCGC | TCCAG      |        |
| #MW291629_Protosalanx_chinensis | .....      | .....      | .....      | .....      | .....      | .....      | .....A.... | .....      | .....      |        |
| [                               | 1111111111 | 1111111111 | 1111111111 | 1111111111 | 1111111111 | 1111111111 | 1111111111 | 1111111111 | 111111     |        |
| [                               | 1111111111 | 1111111111 | 1111111111 | 1112222222 | 2222222222 | 2222222222 | 2222222222 | 2222222222 | 222222     |        |
| [                               | 4444555555 | 5566666666 | 6677777788 | 9990000000 | 0011222222 | 2333333334 | 4444455555 | 5666777778 | 889999     |        |
| [                               | 6788000166 | 7800234456 | 6912234636 | 2270133447 | 8926124557 | 8356667880 | 4445701124 | 5158347890 | 450231     |        |
| [                               | 4358069909 | 2158964792 | 5860540446 | 3463007342 | 7232323281 | 4943692175 | 1479483680 | 8277541055 | 386191     |        |
| #HM106494_Protosalanx_chinensis | CACCTAAATG | AGGCACATTG | CCGCTAAGAA | GTTATTCGTA | CGGTACTTGT | GTAGTGTAAG | AGTTCAATAC | AAAGTTGCCT | GGGCA      |        |
| #HM106492_Neosalanx_anderssoni  | GGTGCCGGCA | CAATGACCCA | TACTCGGAGG | ACCGCTACG  | T.CCGTCGAC | .CGACACGGA | GACCTGGCGT | GGTAC.CTTC | AACTC      |        |
| #MW291629_Protosalanx_chinensis | .....      | .....      | .....      | .....C.... | .A.....    | A.....     | G.....     | .....C.... | .....      |        |
| [                               | 1111111111 | 1111111111 | 1111111111 | 1111111111 | 1111111111 | 1111111111 | 1111111111 | 1111111111 | 111111     |        |
| [                               | 2222233333 | 3333333333 | 3333333333 | 3333333333 | 3333333333 | 3333333333 | 3333333333 | 3334444444 | 444444     |        |
| [                               | 9999900000 | 0001112222 | 2222333333 | 3344444444 | 4555555555 | 5666666667 | 7777778888 | 8990000000 | 000011     |        |
| [                               | 5599923455 | 5561156000 | 3478224468 | 8911145557 | 7002223566 | 9013778890 | 0012272245 | 9060133345 | 566721     |        |
| [                               | 4716730703 | 6983621016 | 6847361403 | 6836962683 | 9064789237 | 2818476922 | 3492561481 | 6884701762 | 514311     |        |
| #HM106494_Protosalanx_chinensis | TTCGATAGGG | TATCTTCGAA | CCAGCTCAAT | TTAGGGAATA | AGACCTTTTG | AGATGATATG | CCCGGTAACA | GGTCAAGTGC | AGATC      |        |
| #HM106492_Neosalanx_anderssoni  | C.T.T.G... | .....      | .....C     | CCGTACGGG  | GAGTTGCCCA | TAGCACCGCA | TATACCGCTG | AAATCGACCT | GACCT      |        |
| #MW291629_Protosalanx_chinensis | CCTATCGAAA | CGCGGCTAGC | ATGATCAGG. | .....      | .....C     | .....C.... | .....      | .....      | .....      |        |
| [                               | 1111111111 | 1111111111 | 1111111111 | 1111111111 | 1111111111 | 1111111111 | 1111111111 | 1111111111 | 111111     |        |
| [                               | 4444444444 | 4444444444 | 4444444444 | 4444444444 | 4444455555 | 5555555555 | 5555555555 | 5555555555 | 555555     |        |
| [                               | 1111111122 | 2334444555 | 5566677777 | 7788888888 | 9999900000 | 0111111222 | 2233333344 | 4444444444 | 666666     |        |
| [                               | 2234678812 | 6041359336 | 8924812233 | 7701227778 | 3668945555 | 6144578258 | 8912446800 | 0223446677 | 466671     |        |
| [                               | 3455656743 | 8124862474 | 2118476925 | 1410253462 | 9364010369 | 5669292781 | 4073142914 | 7891364739 | 978901     |        |
| #HM106494_Protosalanx_chinensis | GCAACAAGCT | AAGGATTTCG | CAATAATTAA | ACGGCCACAG | CTCCATACTT | GGTTTACCTG | GTAAACGTAG | ACGATTCCGT | CCCGC      |        |
| #HM106492_Neosalanx_anderssoni  | ATGGGGGATA | GTAAGCCTAA | TGGCCCCGGG | GTAATTGTGC | GCGAGCCTCC | ACCCCGTGCT | TCGGGGACGC | GTATCCTTCA | GTTTCG     |        |
| #MW291629_Protosalanx_chinensis | A....G...  | ..A.....A  | .....      | .....      | .....      | .....      | .....GA    | .....      | .....      |        |
| [                               | 1111111111 | 1111111111 | 1111111111 | 1111111111 | 1111111111 | 1111111111 | ]          |            |            |        |
| [                               | 5555555555 | 5555555555 | 5555566666 | 6666666666 | 6666666666 | 6666666666 | ]          |            |            |        |
| [                               | 6677777778 | 8888999999 | 9999900000 | 0011111222 | 3444555555 | 5566677777 | ]          |            |            |        |
| [                               | 7822448990 | 0116122233 | 3356911333 | 6812469034 | 0227113556 | 8845800156 | ]          |            |            |        |
| [                               | 2759591781 | 8462023901 | 2943958679 | 6550593449 | 3455783231 | 0421846808 | ]          |            |            |        |
| #HM106494_Protosalanx_chinensis | TTTCTTGCGT | TTCAATATTT | TTGAACAACT | GGCTCATTAG | CCTTCGGAGA | CCTTTTAGAT |            |            |            |        |

#HM106492\_Neosalanx\_anderssoni AG-----TAC GTT-CCCCC CAAGCTCGGC AAAAG.AGCC .TCCAACGAG ATGCCATATC  
#MW291629\_Protosalanx\_chinensis ..CTCCC.CC ...G..... .....T...C T..C..... .....

-----  
The ND5 recombinant region(12957-13360) is highlighted in red bold. Other comments, see the Text S1.
