# Supplementary material for: Recombinant Mitochondrial Genomes Reveal Recent Interspecific Hybridization between Invasive Salangid Fishes
Source: MDPI journal article supplement (doi:10.3390/life12050661), 2022-04-29
Supplement: s1 [file s1]

Text S2. Alignment of variable nucleotide sites of the *Protosalanx chinensis* (MH330683, MW291629) and *Neosalanx tangkahkeii* (KP170510) full mitochondrial genomes, showing evidence of recombination at the *ND4* gene

|                                 |            |            |            |             |            |            |            |            |        |
|---------------------------------|------------|------------|------------|-------------|------------|------------|------------|------------|--------|
| -----                           |            |            |            |             |            |            |            |            |        |
| [                               |            |            |            | 111111111   | 111111111  | 111111111  | 111111111  | 111112222  | 22222] |
| [                               | 12334446   | 7777788888 | 8888899999 | 9000111112  | 2234455555 | 5555566666 | 6677777888 | 8888890222 | 22222] |
| [                               | 650582330  | 0399900011 | 2233502333 | 3011002331  | 4897700112 | 3445682236 | 8814558033 | 4778812046 | 77789] |
| [                               | 4377095563 | 9204623639 | 6823509235 | 8859672566  | 5221926572 | 8347242448 | 7832345169 | 0384720257 | 57857] |
| #MH330683_Protosalanx_chinensis | GCTGACTTAT | TCAACTCCAG | CGTGATTTCG | TAATTTTCTG  | GAGGAACCTT | GAGTGAATAT | ACACCCTCAC | ATGAGATCGT | GAGTT  |
| #KP170510_Neosalanx_tangkahkeii | ATCATTCGCG | CAGGTCCTGA | TACCGCCCAA | CGGCCCATGA  | ATAAGGTTAC | AGAAACTCGC | GAGTTTCTCT | GCATAGCAAC | AGACC  |
| #MW291629_Protosalanx_chinensis | .....      | .....G.    | .....      | .....       | A.A.....   | .....T...  | .....      | .....      | .....  |
|                                 |            |            |            |             |            |            |            |            |        |
| [                               | 222222222  | 222222222  | 222222222  | 222233333   | 333333333  | 333333333  | 333333333  | 333333333  | 33333] |
| [                               | 3333444666 | 7777777788 | 9999999999 | 9999000000  | 0000000011 | 1111111111 | 1222222222 | 2222233333 | 33333] |
| [                               | 6788012567 | 1246889928 | 0223445567 | 7799012223  | 3556789901 | 1134556778 | 9000022344 | 5579901123 | 44669] |
| [                               | 2024213570 | 0973296812 | 3173251762 | 3503870362  | 5395292510 | 3649258365 | 1346747925 | 1450351432 | 14250] |
| #MH330683_Protosalanx_chinensis | GCACTAAAT  | AGAGTTGGAT | TTGTATTCAT | TAAATCTATG  | CACGGTTCCC | GCAGTCTCAT | TTGCCGCTAG | GGTAAACCGC | AGATG  |
| #KP170510_Neosalanx_tangkahkeii | TA.TAGG.GC | GAGACCAAGC | CCAACCCTGC | CCGCCCTCGCA | AGTAACCTTT | ATGACTCTGA | CCATTATCCA | AA.CGGTAAA | CAGAA  |
| #MW291629_Protosalanx_chinensis | ..G....GG. | .....      | .....      | .....       | .....      | .....      | .....      | ..C.....   | .....  |
|                                 |            |            |            |             |            |            |            |            |        |
| [                               | 333333333  | 333333333  | 333333333  | 333333333   | 333333333  | 333333333  | 333333333  | 333344444  | 44444] |
| [                               | 333444444  | 444444445  | 555555555  | 556666666   | 666677777  | 777777777  | 777777888  | 899900111  | 11112] |
| [                               | 9990011223 | 3456679901 | 1223334568 | 8911223446  | 7789000011 | 2233444455 | 7889990133 | 9245160026 | 66993] |
| [                               | 1353503581 | 4651461705 | 8170692761 | 5048398478  | 1768147809 | 5847346958 | 9381474603 | 7960911311 | 69395] |
| #MH330683_Protosalanx_chinensis | TACGGGTAAC | CGTCCGCAAT | AACCTCGGAC | TAATATATTT  | AAGATCGGCG | TAGCATGGAA | TCCAAGTGGG | TGATGGTGGT | ACCTC  |
| #KP170510_Neosalanx_tangkahkeii | CGTAAAGGGT | TACTTATGGC | TCTTCAAAC  | CGCCGCCAC   | GGCGCGAATC | CGATGCAAGG | CTATCACCAC | CATCAACAAC | GTACA  |
| #MW291629_Protosalanx_chinensis | .....      | .....      | .....      | .....       | .....A...  | .....      | .....C...  | .....      | .....  |
|                                 |            |            |            |             |            |            |            |            |        |
| [                               | 444444444  | 444444444  | 444444444  | 444444444   | 444444444  | 444444444  | 444444444  | 444444444  | 44444] |
| [                               | 222222233  | 333333333  | 344444444  | 444444455   | 555555555  | 555555666  | 666666677  | 777777788  | 88888] |
| [                               | 3466788803 | 3455677889 | 9000112344 | 5567889012  | 2334555666 | 7788992234 | 5557899901 | 2368899901 | 12244] |
| [                               | 8728403971 | 4258469584 | 7039284028 | 4792120510  | 3152069258 | 1406252876 | 2589815735 | 1591237985 | 70348] |
| #MH330683_Protosalanx_chinensis | GTTACTTTAA | TCCAGGGAAA | TCCAGTGATT | CCGGAATCAA  | ACAAGTAAAG | TGAGTACTTT | CAATCCATTT | GCACCAACTC | AGATA  |
| #KP170510_Neosalanx_tangkahkeii | ACCCTCCCGC | CTTGAAAGGC | CTTCACAGCA | TTAACGCTCC  | CGG.ACGGGA | CAGACGTCGC | AGGCTTTACG | ATTATGTACT | .ACCT  |
| #MW291629_Protosalanx_chinensis | .....      | .....      | .....      | .....       | ...G.....  | .....      | .....      | .....      | G....  |
|                                 |            |            |            |             |            |            |            |            |        |
| [                               | 444444444  | 444444444  | 555555555  | 555555555   | 555555555  | 555555555  | 555555555  | 555555555  | 55555] |
| [                               | 8888888999 | 9999999999 | 0000000000 | 0011111123  | 3344556666 | 6666777777 | 7777777888 | 8888888888 | 89999] |
| [                               | 6677799011 | 1224567889 | 0223566777 | 7901247831  | 3525483334 | 5669112234 | 4456779001 | 2234556679 | 90012] |
| [                               | 2514758703 | 6283540284 | 4073106025 | 9011944803  | 5831650698 | 7069140981 | 4765142453 | 2516251431 | 46987] |
| #MH330683_Protosalanx_chinensis | TAAACAATGC | GCACTATCTG | GGATCTATAC | GACGAGTATT  | CTCATGTATA | CATACAAATC | CTATCTACTT | ATGCTGTATC | GCCAT  |
| #KP170510_Neosalanx_tangkahkeii | CGGGTGCCCT | ATGTCGCACA | ..GCTCCCGT | ACTAGACTCA  | TATGA.CCGG | TTC.TGCGCT | TCGCACGTCC | TAAACAGGGT | CTTGC  |
| #MW291629_Protosalanx_chinensis | .....      | .....      | AA.....    | .....       | .....A.... | ...G.....  | .....      | .....      | .....  |

|                                 |             |             |            |            |            |            |            |             |            |        |
|---------------------------------|-------------|-------------|------------|------------|------------|------------|------------|-------------|------------|--------|
| [                               | 5555555555  | 6666666666  | 6666666666 | 6666666666 | 6666666666 | 6666666666 | 6666666666 | 6666666666  | 6666666666 | 666666 |
| [                               | 9999999999  | 0000000000  | 0000011111 | 1112222223 | 3333333333 | 3333444444 | 4444444445 | 5555555555  | 555566     |        |
| [                               | 3345667899  | 0013455678  | 8889901222 | 3672335690 | 0122335567 | 8888011122 | 4445677701 | 2333455678  | 99903]     |        |
| [                               | 0924035169  | 5872709551  | 3692843058 | 5704067365 | 8709293651 | 0369737958 | 0692236992 | 1369214354  | 01922]     |        |
| #MH330683_Protosalanx_chinensis | GTAGTCACTC  | AACGCATCTT  | AGAGGTCTAT | CAACCATCCG | TAACCTCGTT | AGCCCTAATT | ATAATTTATG | TCTATGTTAT  | ACTCC      |        |
| #KP170510_Neosalanx_tangkahkeii | TCCACTGTCT  | GGTATGATCC  | CTCCAATCGC | TGGTTCCTTA | CGGTTCAACC | GATTTCGGCC | GCGCCCCGCA | CGCGGACCGC  | CTCTT      |        |
| #MW291629_Protosalanx_chinensis | .....       | .....       | .....      | .....      | .....      | .....      | .....      | .....       | .....      |        |
| [                               | 6666666666  | 6666666666  | 6666667777 | 7777777777 | 7777777777 | 7777777777 | 7777777777 | 7777777777  | 77777      |        |
| [                               | 6666667788  | 8888888899  | 9999990000 | 0111111112 | 2233333333 | 4444444445 | 5555555555 | 5666666677  | 77888]     |        |
| [                               | 3568993544  | 6677789902  | 4446891136 | 9034577997 | 7811234578 | 0334789900 | 2333667788 | 9355688901  | 57012]     |        |
| [                               | 8989581259  | 3956873980  | 0472950649 | 4546057791 | 7336210338 | 6698210638 | 9258581703 | 5725125402  | 48849]     |        |
| #MH330683_Protosalanx_chinensis | CCCGCATGTG  | ACTTAGAAGT  | CCCACTGGAA | TTTTTGATGT | CTCCCTGCCC | ACCCGTGCCA | TGTACTGACG | GCATATTAGT  | CGATT      |        |
| #KP170510_Neosalanx_tangkahkeii | TTTAGGCACA  | GACCGAGGAC  | TTTGTCAAGG | CCCCCAGAAC | TCTATCATAT | TTTAACATAG | CACGACAGTA | TTGCGCC.CC  | TAGCC      |        |
| #MW291629_Protosalanx_chinensis | .....       | .....       | .....      | .....      | .....      | .....      | ....G..... | .....G..    | .....      |        |
| [                               | 7777788888  | 8888888888  | 8888888888 | 8888888888 | 8888888888 | 8888888888 | 8888888888 | 8888888888  | 88888]     |        |
| [                               | 8899900000  | 0000111111  | 1122222222 | 2233333333 | 3333333344 | 4444444444 | 4444555555 | 5556666666  | 66666]     |        |
| [                               | 4545911257  | 8889012567  | 7800112346 | 6801122334 | 5555666801 | 1233444556 | 7789013455 | 8990000123  | 44568]     |        |
| [                               | 7062705715  | 1490840570  | 4879684323 | 9485739257 | 0269258910 | 6512036287 | 3951920517 | 4460258405  | 17923]     |        |
| #MH330683_Protosalanx_chinensis | CAGCCCACTA  | ATCATATGTT  | CCAAATTGTA | ATTTATTTAA | GTCTGTTAGC | CATTGGCCCT | TTATACAACC | CTACAACCTCT | TCACT      |        |
| #KP170510_Neosalanx_tangkahkeii | TTTGTTGACC  | GATTCCACACA | TTGCGCCAG  | CCCCTGCCGT | ACTACCGAT  | AGCCAATTGC | CCGCCTGCTT | TCTTGACTC   | CTTAA      |        |
| #MW291629_Protosalanx_chinensis | ..TG.....   | .....A..    | .....C.... | .....      | .....      | .....      | .....      | .....       | .....      |        |
| [                               | 8888888888  | 8888888888  | 8889999999 | 9999999999 | 9999999999 | 9999999999 | 9999999999 | 9999999999  | 99999]     |        |
| [                               | 6677777777  | 7788889999  | 9990000000 | 0011111111 | 1122222222 | 2222233333 | 3333334444 | 4444444555  | 55556]     |        |
| [                               | 8914567889  | 9938891345  | 6890133356 | 7712235568 | 8912345567 | 7789900012 | 2446790234 | 4666788244  | 57780]     |        |
| [                               | 4340843280  | 1453689405  | 1270803613 | 2813623650 | 6535402543 | 6924747981 | 4286538084 | 7589468269  | 50650]     |        |
| #MH330683_Protosalanx_chinensis | CAAAAGCTCG  | TAATCCTATT  | TATAATCTTA | TAATCTAACC | CTTGCGTTG  | GGACGGCGCG | GTTACTCAGT | TTTTCGTACA  | CCTTG      |        |
| #KP170510_Neosalanx_tangkahkeii | TGGGGAACCTA | CCGCTTCG.A  | CGCTGCTAAG | CGGCTCGGTA | TTCTAACCA  | CAGTAATAAA | CCCGGCTCTC | CACCTAAGTG  | TGCCA      |        |
| #MW291629_Protosalanx_chinensis | .....       | .C.....A.   | .....      | .....      | .....      | .....      | .....      | .....       | .....      |        |
| [                               |             |             |            |            | 111111     | 1111111111 | 1111111111 | 1111111111  | 11111]     |        |
| [                               | 9999999999  | 9999999999  | 9999999999 | 9999999999 | 9999000000 | 0000000000 | 0000000000 | 0000000000  | 00000]     |        |
| [                               | 6666666666  | 6777777777  | 7888888888 | 8899999999 | 9999000001 | 1111111112 | 2222222222 | 2333333333  | 34444]     |        |
| [                               | 1112467889  | 9000447788  | 9011334668 | 8900123444 | 5789011573 | 3567778893 | 3455666778 | 9111224689  | 90012]     |        |
| [                               | 2784119081  | 7469585847  | 3547584580 | 9214684039 | 5324025431 | 4813492513 | 6817036281 | 0147391891  | 23951]     |        |
| #MH330683_Protosalanx_chinensis | CATATAAAAA  | TGTAGCCACA  | GTAAACAATC | CTCACACGGG | TGTCGATAGG | GTTCCACAAT | AACTATCGCC | GCCCACTCAT  | TTATG      |        |
| #KP170510_Neosalanx_tangkahkeii | TCCTCGGGTG  | CACGATACTG  | ACCGGTGGCT | TCTGGCTAAA | CCCTAGCGAA | ACC.G..T.. | .....      | .....       | .....      |        |
| #MW291629_Protosalanx_chinensis | .....       | .....       | .....      | .....      | .....G..   | ...TGTATGC | CGTCCCTATA | AGTTGTCTGC  | CCGCA      |        |

|                                 |            |            |            |             |            |            |            |            |            |        |
|---------------------------------|------------|------------|------------|-------------|------------|------------|------------|------------|------------|--------|
| [                               | 1111111111 | 1111111111 | 1111111111 | 1111111111  | 1111111111 | 1111111111 | 1111111111 | 1111111111 | 1111111111 | 111111 |
| [                               | 0000000000 | 0000000000 | 0000000000 | 0000000000  | 0000000000 | 0000000000 | 0011111111 | 1111111111 | 1111111111 | 111111 |
| [                               | 4444444445 | 5555555566 | 6666666666 | 6777777777  | 7888888888 | 8899999999 | 9900000000 | 0000111111 | 1111111111 | 111111 |
| [                               | 2445688890 | 2333566701 | 1114577799 | 9001146778  | 9001233567 | 8911135566 | 7945567788 | 8999012345 | 56678      |        |
| [                               | 4281915768 | 9039635750 | 3697003613 | 4392529254  | 9587325927 | 3513912517 | 0724792514 | 7369540043 | 62810      |        |
| #MH330683_Protosalanx_chinensis | TAGAATTCGA | GGGATTGGCG | CCAGGTGGGC | ACACGATCCC  | GGGATTCCCC | AAGCCAATAG | GCTACATATC | CACGCAGCTC | CGCGA      |        |
| #KP170510_Neosalanx_tangkahkeii | .....      | .....      | .....      | .....       | .....      | .....      | .....      | .....      | .....      |        |
| #MW291629_Protosalanx_chinensis | CGAGGCCAAG | ATAGCCACTA | TTGAACCTAG | CTGTAGCTTT  | AAAGACTTTT | GGATTGGGGA | ATCTTGCGAA | TGGATGATAT | TCTAG      |        |
| [                               | 1111111111 | 1111111111 | 1111111111 | 1111111111  | 1111111111 | 1111111111 | 1111111111 | 1111111111 | 1111111111 | 111111 |
| [                               | 1111111111 | 1111111111 | 1111111111 | 1111111111  | 1111111111 | 1111111111 | 1111111111 | 1111111111 | 1111111111 | 111111 |
| [                               | 1112222222 | 2222233333 | 3333334444 | 4444444445  | 5555555555 | 5555556666 | 6666666667 | 7777777788 | 889999     |        |
| [                               | 8890011345 | 5578801223 | 6677790001 | 2334567890  | 0112333556 | 7778880001 | 2244467890 | 1222355612 | 22266      |        |
| [                               | 6781401432 | 5832800170 | 7925892584 | 0384664621  | 7695147288 | 0362584698 | 1725805115 | 7369236530 | 56579      |        |
| #MH330683_Protosalanx_chinensis | GGAATCTGCT | TTCCCTCCCG | CCCTCCACCA | GGCAAACCTC  | TGACGCGCTC | ACCACTCCTG | TGCCCCCACT | CGCAGGTAGC | CTTCG      |        |
| #KP170510_Neosalanx_tangkahkeii | .....      | .....      | .....      | .....       | .....      | .....      | .....      | .....      | ..CGA      |        |
| #MW291629_Protosalanx_chinensis | AAGGATCTTC | ACATTAATTA | TGTCTTGTTT | CAGCGTACTT  | AAGTATATAT | GAAGTCTGCC | CATTTTGTGC | GATTAACGAT | TC...      |        |
| [                               | 1111111111 | 1111111111 | 1111111111 | 1111111111  | 1111111111 | 1111111111 | 1111111111 | 1111111111 | 1111111111 | 111111 |
| [                               | 1112222222 | 2222222222 | 2222222222 | 2222222222  | 2222222222 | 2222222222 | 2222222222 | 2222222222 | 222222     |        |
| [                               | 9990000000 | 0000111111 | 1111222222 | 2222222223  | 3333333334 | 4444444445 | 5555556666 | 6667777777 | 777777     |        |
| [                               | 7780012344 | 7788000223 | 6999123344 | 5667788891  | 3445677780 | 1222444781 | 2344581345 | 5780134466 | 77789      |        |
| [                               | 5761415845 | 0328369486 | 0369732847 | 9281756953  | 4095703626 | 5147258211 | 3214003495 | 8986262509 | 02580      |        |
| #MH330683_Protosalanx_chinensis | CTTTATCCGT | CATCTAAGAT | TCTCCCTTTT | GGTTGGAGGA  | CTAATGTTAG | CACCGGTCAT | CCCGCAATAT | AAGTATGCAC | CGGGG      |        |
| #KP170510_Neosalanx_tangkahkeii | TCCCGCTTAC | AGCACCCCGC | CTCTTTCCCC | AAACA.CAAG  | TCGGAACCGA | TGTTAACTGC | TTTAAGCCGC | CGACGCAAGT | AAAAA      |        |
| #MW291629_Protosalanx_chinensis | .....      | .....      | .....      | .....A..... | .....      | .....      | .....      | .....      | .....      |        |
| [                               | 1111111111 | 1111111111 | 1111111111 | 1111111111  | 1111111111 | 1111111111 | 1111111111 | 1111111111 | 1111111111 | 111111 |
| [                               | 2222222222 | 2222222222 | 2222233333 | 3333333333  | 3333333333 | 3333333333 | 3333333333 | 3333333333 | 333333     |        |
| [                               | 7788888899 | 9999999999 | 9999900000 | 0000000111  | 1111222222 | 2333333333 | 3333333334 | 4444444444 | 444455     |        |
| [                               | 9923455700 | 1122223334 | 5689900233 | 4455679011  | 2346013344 | 7001122344 | 4567778891 | 1234455557 | 88901      |        |
| [                               | 6998439747 | 0623581473 | 8481736406 | 5818050847  | 0242135706 | 5362817625 | 9113584791 | 7327806798 | 13513      |        |
| #MH330683_Protosalanx_chinensis | CCCTGCGTTG | TGCATCCTGA | CTGAACCCCA | AAAAGTTAGG  | ACTTATGACC | GTTCTTCCAG | CGGACTTTTT | GTTGACCATT | AGAGA      |        |
| #KP170510_Neosalanx_tangkahkeii | TTTCCGACCA | AATGCTTCAG | TCAGGAAATG | GGGCACCCCA  | GGCGGCACTT | ACCTCCTTCC | TAACACCCCC | TCCTGATGCC | GAGCG      |        |
| #MW291629_Protosalanx_chinensis | .....      | .....      | .....      | .....       | .....      | .....      | .....      | .....      | G....      |        |
| [                               | 1111111111 | 1111111111 | 1111111111 | 1111111111  | 1111111111 | 1111111111 | 1111111111 | 1111111111 | 1111111111 | 111111 |
| [                               | 3333333333 | 3333333333 | 3333333333 | 3333333333  | 3333333333 | 3333333333 | 3333333333 | 4444444444 | 444444     |        |
| [                               | 5555555555 | 5555555666 | 6666666677 | 7777777788  | 8888888888 | 8888899999 | 9999999999 | 0000000000 | 00001      |        |
| [                               | 1234455556 | 6667778012 | 3556788901 | 2445566800  | 0011234445 | 5667800011 | 1245667789 | 0113345566 | 77890      |        |
| [                               | 7592063581 | 4783492994 | 9040547037 | 6140389114  | 6739290391 | 2010503925 | 8724792549 | 8781872325 | 47387      |        |
| #MH330683_Protosalanx_chinensis | ACTATCTGGC | TAGTGCCGAA | TAAAGTTAGA | GCAGTTCCTA  | GCCGAGGTCG | AAACAGGGAT | TAGAGTTAGA | ATAATGACGA | TAAGA      |        |
| #KP170510_Neosalanx_tangkahkeii | TTACCTCAAT | CC.CATACGG | CTGCACCGAT | CTGACCT.CC  | ATTGCAACTA | GGGAGAAAGC | CGAGACCGAG | GCGGCAGAAC | CCCAG      |        |

```

#MW291629_Protosalanx_chinensis      ..... ..C..... .....A.. .T..... .....
[ 1111111111 1111111111 1111111111 1111111111 1111111111 1111111111 1111111111 1111111111 1111111111 111111]
[ 4444444444 4444444444 4444444444 4444444444 4444444444 4444444444 4444444444 4444444444 4444444444 444444]
[ 1111111111 2222222222 3333344444 4444445555 5555556666 6666677777 7777777788 8888899999 999999]
[ 1345577889 1122345889 0344900113 3566790112 5678991277 8899901233 3345588902 5678823446 66789]
[ 0702836787 4814087150 2013925452 8958788365 8705478128 1703954625 8940309845 8795840250 36213]
#MH330683_Protosalanx_chinensis      AGGAGAAGGC CCATCATGGA ATCGCAATTT TTCTGGCTCA CGTCATAACC CATTCACATA AGTCGCCAGC AAAGGCCCTC CTTTA
#KP170510_Neosalanx_tangkahkeii      GAAGACGAAT TTGCAGCCCG TCTAAGGCCC CCTCAATCAC TACAGCGGTT TCCCTCTGCG CACGATAGTT GGCAATTGCT TCCCG
#MW291629_Protosalanx_chinensis      ..... ..A..... .....A..... .....G..... .....
[ 1111111111 1111111111 1111111111 1111111111 1111111111 1111111111 1111111111 1111111111 1111111111 111111]
[ 4455555555 5555555555 5555555555 5555555555 5555555555 5555555555 5555555555 5555555555 5555555555 55555]
[ 9900000000 0000011111 1111222222 2222222233 3333333333 3333344444 4444444555 5666666677 77777]
[ 9901134455 6668822446 6899022333 4566789902 2334444556 6778900334 4467889011 8255788923 44455]
[ 6951424739 2586924091 4217947369 8413843923 6281578345 8143247474 6949251958 6524145082 67926]
#MH330683_Protosalanx_chinensis      GACATATCAT TCGACCTCTG CATTTTCGTT ACTATGTGAG AATCCCAACG TCGTTGAATA TTCTTCTTCC AGAACCCCTC CACTC
#KP170510_Neosalanx_tangkahkeii      ACTCCGCTCC CTACGTAAAC TGCCCTACC GGCGCCGACA GGCATTGGTA CTACCAGGCG CCTCCTACTT G...TTGA-- TGGAT
#MW291629_Protosalanx_chinensis      ..... ..A..... ..... ..ACG.T..CT ...CT
[ 1111111111 1111111111 1111111111 1111111111 1111111111 1111111111 1111111111 1111111111 ]
[ 5555555555 5555555566 6666666666 6666666666 6666666666 6666666666 6666666666 6666666666 ]
[ 7777778888 8899999900 0000000000 0111111112 2222234444 4555555666 6777777777 ]
[ 5666880068 8855678901 1123466778 8223679990 0237712337 8235667489 9000001115 ]
[ 7267041453 5607153252 3924312052 9093347892 9691459021 7089366710 5235791785 ]
#MH330683_Protosalanx_chinensis      -TCCTGGTAT TTGGTTACCT CCACCTCGAC CCGTCATTTT TAACTCCTTT ATGCGACTTG TGATGTAGCA
#KP170510_Neosalanx_tangkahkeii      GATG-----C GCCAGATTGC TTCACCATCT TAAATTAAGT GGTAGTTCGA CCTACGGACC CAGCAACAAT
#MW291629_Protosalanx_chinensis      C...CCCCG. ....T.... ....G. ....

```

-----  
The ND4 (10173-11826) recombinant regions is highlighted in red bold. Other comments, see the Text S1.
