# Supplementary material for: Recombinant Mitochondrial Genomes Reveal Recent Interspecific Hybridization between Invasive Salangid Fishes
Source: MDPI journal article supplement (doi:10.3390/life12050661), 2022-04-29
Supplement: s1 [file s1]

Text S1. Alignment of variable nucleotide sites of the *Protosalanx chinensis* (KJ499917, MW291629) and *Neosalanx tangkahkeii* (KP170510) full mitochondrial genomes, showing evidence of recombination at the *COI* and *ND4* genes, and also at the control region

|                                 |             |            |             |            |             |            |            |            |        |
|---------------------------------|-------------|------------|-------------|------------|-------------|------------|------------|------------|--------|
| [                               |             |            |             | 1111111111 | 1111111111  | 1111111111 | 1111111111 | 1111222222 | 22222] |
| [                               | 12334446    | 7777788888 | 8888999999  | 0001111122 | 2344555555  | 5555566666 | 7777788888 | 8889022222 | 22233] |
| [                               | 650582330   | 0399900012 | 2335023333  | 0110023314 | 8977001123  | 4456823688 | 1455803347 | 7881204677 | 78967] |
| [                               | 4377095563  | 9204623696 | 8235092358  | 8596725665 | 2219265728  | 3472444878 | 3234516903 | 8472025757 | 85720] |
| #KJ499917_Protosalanx_chinensis | GCTGACTTAT  | TCAACTCCGC | GTGATTTCGT  | AATTTTCTGG | AGGAACCTTG  | AGTGATATAC | ACCCTCACAT | GAGATCGTGA | GTTCG  |
| #KP170510_Neosalanx_tangkahkeii | ATCATTTCCGC | CAGGTCTTAT | ACCGCCCAAC  | GGCCCATGAA | TAAAGTTTACA | GAAACCGCGA | GTTTCTCTGC | ATAGCAACAG | ACCTA  |
| #MW291629_Protosalanx_chinensis | .....       | .....      | .....       | .....A     | .A.....     | .....      | .....      | .....      | .....  |
| [                               | 2222222222  | 2222222222 | 2222222222  | 2233333333 | 3333333333  | 3333333333 | 3333333333 | 3333333333 | 33333] |
| [                               | 3344466677  | 7777778899 | 9999999999  | 9900000000 | 0000001111  | 1111111112 | 2222222222 | 2223333333 | 33333] |
| [                               | 8801256712  | 4688992802 | 2344556777  | 9901222335 | 5678990111  | 3455677890 | 0002234455 | 7990112344 | 66999] |
| [                               | 2421357009  | 7329681231 | 7325176235  | 0387023625 | 9529251036  | 4925836513 | 4674792514 | 5035143214 | 25013] |
| #KJ499917_Protosalanx_chinensis | GCTAAAATAG  | AGTTGGATT  | GTATTTCATTA | AATCTATGCA | CGGTTCCCGC  | AGTCTCATTT | GCCGCTAGGG | TAAACCGCAG | ATGTA  |
| #KP170510_Neosalanx_tangkahkeii | ATAGG.GCGA  | GACCAAGCCC | AACCTTGCCC  | GCCTCGCAAG | TAACCTTTAT  | GACTCTGACC | ATTATCCAAA | .CGGTAAACA | GAACG  |
| #MW291629_Protosalanx_chinensis | .....GG...  | .....      | .....       | .....      | .....       | .....      | .....      | C.....     | .....  |
| [                               | 3333333333  | 3333333333 | 3333333333  | 3333333333 | 3333333333  | 3333333333 | 3333333333 | 3344444444 | 44444] |
| [                               | 3444444444  | 4444445555 | 5555555555  | 6666666666 | 6677777777  | 7777777777 | 7777888889 | 9900111111 | 11222] |
| [                               | 9001122334  | 5667990112 | 2333456889  | 1122344677 | 8900001122  | 3344445578 | 8999013392 | 4516002666 | 99334] |
| [                               | 5350358146  | 5146170581 | 7069276150  | 4839847817 | 6814780958  | 4734695893 | 8147460379 | 6091131169 | 39587] |
| #KJ499917_Protosalanx_chinensis | CGGGTAACCG  | TCCGCAATAA | CCTCGGACTA  | ATATATTTAA | GATCGGCGTA  | GCATGGAATC | CAAGTGGGTG | ATGGTGGTAC | CTCGT  |
| #KP170510_Neosalanx_tangkahkeii | TAAAGGGTTA  | CTTATGGCTC | TTCAAACCTCG | CCGCCACCGG | CGCGAATCCG  | ATGCAAGGCT | ATCACCACCA | TCAACAACGT | ACAAC  |
| #MW291629_Protosalanx_chinensis | .....       | .....      | .....       | .....      | ....A....   | .....      | ....C....  | .....      | .....  |
| [                               | 4444444444  | 4444444444 | 4444444444  | 4444444444 | 4444444444  | 4444444444 | 4444444444 | 4444444444 | 44444] |
| [                               | 222223333   | 3333333334 | 4444444444  | 4444455555 | 5555555555  | 5555666666 | 6666667777 | 7777778888 | 88888] |
| [                               | 6678880334  | 5567788990 | 0011234455  | 6788901223 | 3455566677  | 8899223455 | 5789990123 | 6889990112 | 24466] |
| [                               | 2840397142  | 5846958470 | 3928402847  | 9212051031 | 5206925814  | 0625287625 | 8981573515 | 9123798570 | 34825] |
| #KJ499917_Protosalanx_chinensis | TACTTTAATC  | CAGGGAAATC | CAGTGATTCC  | GGAATCAAAC | AAGTAAAGTG  | AGTACTTTCA | ATCCATTTCG | ACCAACTCAG | ATATA  |
| #KP170510_Neosalanx_tangkahkeii | CCTCCCGCCT  | TGAAAGGCCT | TCACAGCAT   | AACGCTCCCG | G.ACGGGACA  | GACGTCGCAG | GCTTTACGAT | TATGTACT.A | CCTCG  |
| #MW291629_Protosalanx_chinensis | .....       | .....      | .....       | .....      | .G.....     | .....      | .....      | .....G.    | .....  |
| [                               | 4444444444  | 4444444455 | 5555555555  | 5555555555 | 5555555555  | 5555555555 | 5555555555 | 5555555555 | 55555] |
| [                               | 8888899999  | 9999999900 | 0000000000  | 1111112333 | 4455666666  | 6677777777 | 7777788888 | 8888888889 | 99999] |
| [                               | 7779901112  | 2456788902 | 2356677779  | 0124783135 | 2548333456  | 6911223444 | 5677900122 | 3455667990 | 01233] |
| [                               | 1475870362  | 8354028440 | 7310602590  | 1194480358 | 3165069870  | 6914098147 | 6514245325 | 1625143146 | 98709] |
| #KJ499917_Protosalanx_chinensis | AACAATGCGC  | ACTATCTGGG | ATCTATACGA  | CGAGTATTCT | CATGCC      |            |            |            |        |

|                                 |            |            |             |             |             |            |            |             |            |            |
|---------------------------------|------------|------------|-------------|-------------|-------------|------------|------------|-------------|------------|------------|
| [                               | 5555555566 | 6666666666 | 6666666666  | 6666666666  | 6666666666  | 6666666666 | 6666666666 | 6666666666  | 6666666666 | 6666666666 |
| [                               | 9999999900 | 0000000000 | 0001111111  | 1222222333  | 3333333333  | 3344444444 | 4444444555 | 5555555555  | 566666     |            |
| [                               | 4566789900 | 1345567888 | 8990122236  | 7233569001  | 2233556788  | 8801112244 | 4567770123 | 3345567899  | 90335      |            |
| [                               | 2403516958 | 7270955136 | 9284305857  | 0406736587  | 0929365103  | 6973795806 | 9223699213 | 6921435401  | 92289      |            |
| #KJ499917_Protosalanx_chinensis | AGTCACTCAA | CGCATCTTAG | AGGTCCTATCA | ACCATCCGTA  | ACCTCGTTAG  | CCCTAATTAT | AATTTATGTC | TATGTTATATC | TCCCC      |            |
| #KP170510_Neosalanx_tangkahkeii | CACTGTCTGG | TATGATCCCT | CCAATCGCTG  | GTTCCCTTACG | GTTCAACCGA  | TTTCGGCCGC | GCCCCGCACG | CGGACCCGCT  | CTTTT      |            |
| #MW291629_Protosalanx_chinensis | .....      | .....      | .....       | .....       | .....       | .....      | .....      | .....       | .....      |            |
|                                 |            |            |             |             |             |            |            |             |            |            |
| [                               | 6666666666 | 6666666666 | 6666777777  | 7777777777  | 7777777777  | 7777777777 | 7777777777 | 7777777777  | 777777     |            |
| [                               | 6666778888 | 8888889999 | 9999000001  | 1111111222  | 3333333344  | 4444444555 | 5555555556 | 6666667777  | 88888      |            |
| [                               | 6899354466 | 7778990244 | 4689113690  | 3457799778  | 1123457803  | 3478990023 | 3366778893 | 5568890157  | 01245      |            |
| [                               | 8958125939 | 5687398004 | 7295064945  | 4605779173  | 3621033866  | 9821063892 | 5858170357 | 2512540248  | 84970      |            |
| #KJ499917_Protosalanx_chinensis | CGCATGTGAC | TTAGAAGTCC | CACTGGAATT  | TTTGATGTCT  | CCCTGCCCCAC | CCGTGCCATG | TAGTGACGGC | ATATTGGTCG  | ATTCA      |            |
| #KP170510_Neosalanx_tangkahkeii | TAGGCACAGA | CCGAGGACTT | TGTCAAGGCC  | CCCAGAACTC  | TATCATATTT  | TAACATAGCA | CGACAGTATT | GCGCCACCTA  | GCCTT      |            |
| #MW291629_Protosalanx_chinensis | .....      | .....      | .....       | .....       | .....       | .....      | .....      | .....       | .....      |            |
|                                 |            |            |             |             |             |            |            |             |            |            |
| [                               | 7888888888 | 8888888888 | 8888888888  | 8888888888  | 8888888888  | 8888888888 | 8888888888 | 8888888888  | 88888      |            |
| [                               | 9000000000 | 1111111122 | 2222222233  | 3333333333  | 3333444444  | 4444444444 | 5555555556 | 6666666666  | 66677      |            |
| [                               | 9112578889 | 0125677800 | 1123466801  | 1223345555  | 6668011233  | 4445567789 | 0134558990 | 0001234456  | 88914      |            |
| [                               | 7057151490 | 8405704879 | 6843239485  | 7392570269  | 2589106512  | 0362873951 | 9205174460 | 2584051792  | 34340      |            |
| #KJ499917_Protosalanx_chinensis | CCACTAATCA | TATGTTCCAA | ATTTGAATTT  | ATTTAAGTCT  | GTTAGCCATT  | GGCCCTTTAT | ACAACCCTAC | AACTCTTCAC  | TCAA       |            |
| #KP170510_Neosalanx_tangkahkeii | TTGACCGATT | CCCACATTCG | GCCCAGCCCC  | TGCCGTACTC  | ACCGATAGCC  | AATTGCCCCG | CTGCTTTCTT | GGACTCCTTA  | ATGGG      |            |
| #MW291629_Protosalanx_chinensis | .....      | ...A.....  | .C.....     | .....       | .....       | .....      | .....      | .....       | .....      |            |
|                                 |            |            |             |             |             |            |            |             |            |            |
| [                               | 8888888888 | 8888888889 | 9999999999  | 9999999999  | 9999999999  | 9999999999 | 9999999999 | 9999999999  | 99999      |            |
| [                               | 7777777788 | 8899999990 | 0000000011  | 1111111122  | 2222222222  | 2333333333 | 3344444444 | 4445555555  | 66666      |            |
| [                               | 5678899938 | 8913456890 | 1333567712  | 2355688912  | 3455677789  | 9000122446 | 7902344666 | 7882445778  | 01112      |            |
| [                               | 8432801453 | 6894051270 | 8036132813  | 6236506535  | 4025436924  | 7479814286 | 5380847589 | 4682695065  | 02784      |            |
| #KJ499917_Protosalanx_chinensis | AGCTCGTAAT | CCTATTTATA | ATCTTATAAT  | CTAACCCCTT  | GCGTTGGGAC  | GGCGCGGTTA | CTCAGTTTTT | CGTACACCTT  | GCATA      |            |
| #KP170510_Neosalanx_tangkahkeii | GAACTACCGC | TTTCG.AC   | GCTAAGCGGC  | TCGTTATTCC  | TAACCACAGT  | AATAAACCCG | GCTCTCCACC | TAAGTGTGCC  | ATCCT      |            |
| #MW291629_Protosalanx_chinensis | .....C..   | ....A..... | .....       | .....       | .....       | .....      | .....      | .....       | .....      |            |
|                                 |            |            |             |             |             |            |            |             |            |            |
| [                               |            |            |             |             | 1111111111  | 1111111111 | 1111111111 | 1111111111  | 11111      |            |
| [                               | 9999999999 | 9999999999 | 9999999999  | 9999999999  | 0000000000  | 0000000000 | 0000000000 | 0000000000  | 00000      |            |
| [                               | 6666666777 | 7777777888 | 8888888899  | 9999999999  | 0000011111  | 1111122222 | 2222222333 | 3333333444  | 44444      |            |
| [                               | 4678899000 | 4477889011 | 3346688900  | 1234445789  | 0115733567  | 7788933455 | 6667789111 | 2246899001  | 22445      |            |
| [                               | 1190817469 | 5858473547 | 5845809214  | 6840395324  | 0254314813  | 4925136817 | 0362810147 | 3918912395  | 14281      |            |
| #KJ499917_Protosalanx_chinensis | TAAAAATGTA | GCCACAGTAA | ACAATCCTCA  | CACGGGTGTC  | GATAGGGTTC  | CACAATAACT | ATCGCCGCC  | ACTCATTAT   | GTAGA      |            |
| #KP170510_Neosalanx_tangkahkeii | CGGGTGCACG | ATACTGACCG | GTGGCTTCTG  | GCTAAACCTT  | AGCGAAACC.  | G..T.....  | .....      | .....       | .....      |            |
| #MW291629_Protosalanx_chinensis | .....      | .....      | .....       | .....       | ...G.....   | T          | GTATGCCGTC | CCTATAAGTT  | GTCTGCCGCG | ACGAG      |

|                                 |             |            |            |            |             |            |            |            |            |        |
|---------------------------------|-------------|------------|------------|------------|-------------|------------|------------|------------|------------|--------|
| [                               | 1111111111  | 1111111111 | 1111111111 | 1111111111 | 1111111111  | 1111111111 | 1111111111 | 1111111111 | 1111111111 | 111111 |
| [                               | 0000000000  | 0000000000 | 0000000000 | 0000000000 | 0000000000  | 0000000000 | 0000000011 | 1111111111 | 1111111111 | 111111 |
| [                               | 4444455555  | 5555666666 | 6666666777 | 7777777888 | 8888888899  | 9999999900 | 0000000000 | 1111111111 | 1111111111 | 111112 |
| [                               | 6888902333  | 5667011114 | 5777999001 | 1467789001 | 2335678911  | 1355667945 | 5677888999 | 0123455667 | 88890      |        |
| [                               | 9157689039  | 6357503697 | 0036134392 | 5292549587 | 3259273513  | 9125170724 | 7925147369 | 5400436281 | 06781      |        |
| #KJ499917_Protosalanx_chinensis | ATTGAGGGA   | TTGGCGCCAG | GTGGGCACAC | GATCCCGGGA | TTCCCAAGC   | CAATAGGCTA | CATATCCACG | CAGCTCCGCG | AGGAA      |        |
| #KP170510_Neosalanx_tangkahkeii | .....       | .....      | .....      | .....      | .....       | .....      | .....      | .....      | .....      |        |
| #MW291629_Protosalanx_chinensis | GCCAAGATAG  | CCACTATTGA | ACCTAGCTGT | AGCTTTAAAG | ACTTTTGGAT  | TGGGAATCT  | TGCGAATGGA | TGATATTCTA | GAAGG      |        |
| [                               | 1111111111  | 1111111111 | 1111111111 | 1111111111 | 1111111111  | 1111111111 | 1111111111 | 1111111111 | 1111111111 | 111111 |
| [                               | 1111111111  | 1111111111 | 1111111111 | 1111111111 | 1111111111  | 1111111111 | 1111111111 | 1111111111 | 1111111111 | 111112 |
| [                               | 2222222222  | 2333333333 | 3344444444 | 4444455555 | 5555555555  | 5566666666 | 6666677777 | 7777888899 | 99990      |        |
| [                               | 0113455578  | 8012236677 | 7900012334 | 5678900112 | 3335567778  | 8800012244 | 4678901222 | 3556122226 | 67780      |        |
| [                               | 4014325832  | 8001707925 | 8925840384 | 6646217695 | 1472880362  | 5846981725 | 8051157369 | 2365305657 | 95761      |        |
| #KJ499917_Protosalanx_chinensis | TCTGCTTTCG  | CCTCCGCCCT | CCACCAGGCA | AACTCTGAC  | GCGCTACCA   | CTCTGTGCC  | CCCACTCGCA | GGTAGCCTTC | GCTTT      |        |
| #KP170510_Neosalanx_tangkahkeii | .....       | .....      | .....      | .....      | .....       | .....      | .....      | .....CG    | ATCCC      |        |
| #MW291629_Protosalanx_chinensis | ATCTTCACAT  | TAATTATGTC | TTGTTTCAGC | GTACTTAAGT | ATATATGAAG  | TCTGCCATT  | TTGTTCGATT | AACGATTC.. | .....      |        |
| [                               | 1111111111  | 1111111111 | 1111111111 | 1111111111 | 1111111111  | 1111111111 | 1111111111 | 1111111111 | 1111111111 | 111111 |
| [                               | 2222222222  | 2222222222 | 2222222222 | 2222222222 | 2222222222  | 2222222222 | 2222222222 | 2222222222 | 222222     |        |
| [                               | 0000000000  | 1111111111 | 2222222222 | 2222233333 | 3333344444  | 4444455555 | 5566666667 | 7777777777 | 77788      |        |
| [                               | 0123447788  | 0002236999 | 1233445667 | 7888913445 | 6777801222  | 4447812344 | 5813455780 | 1344667778 | 99923      |        |
| [                               | 4158450328  | 3694860369 | 7328479281 | 7569534095 | 7036265147  | 2582113214 | 0034958986 | 2625090258 | 06998      |        |
| #KJ499917_Protosalanx_chinensis | ATCCGTCATC  | TAAGATTCTC | CCTTTTGGTT | GGAGGACTAA | TGTTAGCACC  | GGTCATCCCG | CAATATAAGT | ATGCACCGGG | GCCCT      |        |
| #KP170510_Neosalanx_tangkahkeii | GCTTACAGCA  | CCCCGCCTCT | TTCCCCAAAC | A.CAAGTCGG | AACCGATGTT  | AACTGCTTTA | AGCCGCCGAC | GCAAGTAAAA | ATTTC      |        |
| #MW291629_Protosalanx_chinensis | .....       | .....      | .....      | .A.....    | .....       | .....      | .....      | .....      | .....      |        |
| [                               | 1111111111  | 1111111111 | 1111111111 | 1111111111 | 1111111111  | 1111111111 | 1111111111 | 1111111111 | 1111111111 | 111111 |
| [                               | 2222222222  | 2222222222 | 2333333333 | 3333333333 | 3333333333  | 3333333333 | 3333333333 | 3333333333 | 333333     |        |
| [                               | 8888999999  | 9999999999 | 9000000000 | 0001111111 | 2222222333  | 3333333333 | 3333344444 | 4444444445 | 55555      |        |
| [                               | 4557001122  | 2233345689 | 9002334455 | 6790112346 | 0133447001  | 1223444567 | 7788911234 | 4555578890 | 11223      |        |
| [                               | 4397470623  | 5814738481 | 7364065818 | 0508470242 | 1357065362  | 8176259113 | 5847917327 | 8067981351 | 37592      |        |
| #KJ499917_Protosalanx_chinensis | GCGTTGTGCA  | TCCTGACTGA | ACCCCAAAAA | GTTAGGACTT | ATGACCGTTC  | TTCCAGCGGA | CTTTTGTGTT | ACCATTAGAG | AACTA      |        |
| #KP170510_Neosalanx_tangkahkeii | CGACCAAAATG | CTTCAGTCAG | GAAATGGGCG | ACCCAGGCG  | GCACCTACCT  | CCTTCCTAAC | ACCCCTCCT  | GATGCCGAGC | GTTAC      |        |
| #MW291629_Protosalanx_chinensis | .....       | .....      | .....      | .....      | .....       | .....      | .....      | .....G...  | .....      |        |
| [                               | 1111111111  | 1111111111 | 1111111111 | 1111111111 | 1111111111  | 1111111111 | 1111111111 | 1111111111 | 1111111111 | 111111 |
| [                               | 3333333333  | 3333333333 | 3333333333 | 3333333333 | 3333333333  | 3333333333 | 3333334444 | 4444444444 | 444444     |        |
| [                               | 5555555555  | 5556666666 | 6666777777 | 7777888888 | 8888888888  | 8999999999 | 9999990000 | 0000000000 | 111111     |        |
| [                               | 4455566667  | 7780123556 | 7889012445 | 5668000011 | 2344455667  | 8000111245 | 6677890113 | 3455667789 | 01345      |        |
| [                               | 0635814783  | 4929949040 | 5470376140 | 3891146739 | 2903912010  | 5039258724 | 7925498781 | 8723254738 | 70702      |        |
| #KJ499917_Protosalanx_chinensis | TCTGGCTAGT  | GCCGAATAAA | GTTAGAGCAG | TTCTAGCCG  | AGGTCGAAAC  | AGGGATTAGA | GTTAGAATAA | TGACGATAAG | AAGGA      |        |
| #KP170510_Neosalanx_tangkahkeii | CTCAATCC.C  | ATACGGCTGC | ACCGATCTGA | CCT.CCATTC | GAAC TAGGGA | GAAAGCCGAG | ACCGAGGCGG | CAGAACCCCA | GGAAG      |        |
| #MW291629_Protosalanx_chinensis | .....C.     | .....      | .....      | ...A...T.. | .....       | .....      | .....      | .....      | .....      |        |

```

[ 1111111111 1111111111 1111111111 1111111111 1111111111 1111111111 1111111111 1111111111 1111111111 111111]
[ 4444444444 4444444444 4444444444 4444444444 4444444444 4444444444 4444444444 4444444444 4444444444 44455]
[ 1111112222 2222223333 3444444444 4445555555 5566666666 6777777777 7777888888 8999999999 99900]
[ 5778891122 3458890344 9001133456 6790112578 9912778899 9012333345 5889012678 8234466678 99901]
[ 8367874814 0871502013 9254528295 8788365805 4781281703 9546258940 3098465795 8402503621 36951]
#KJ499917_Protosalanx_chinensis GAAGGCCCAT CATGGAATCG CAATTTTATC TGGCTCACTC ATAACCCATT CACATAAGTC GCCAGGCAAG GCCCTCCTCT AGACA
#KP170510_Neosalanx_tangkahkeii ACGAATTTGC AGCCCGTCTA AGGCCCGCT CAATCACTCA GCGGTTTCCC TCTGCGCACG ATAGTATGCA ATTGCTTC.C GACTC
#MW291629_Protosalanx_chinensis .....A .....G.. ..... ..... .....A.... .....T. ....

[ 1111111111 1111111111 1111111111 1111111111 1111111111 1111111111 1111111111 1111111111 1111111111 111111]
[ 5555555555 5555555555 5555555555 5555555555 5555555555 5555555555 5555555555 5555555555 5555555555 55555]
[ 0000000000 0111111111 2222222222 2222333333 3333333333 3444444444 4445555666 6677777888 89999]
[ 1344556668 8224466899 0223334566 7899022334 4445566778 9003344467 8890118255 7855666088 85567]
[ 4247392586 9240914217 9473698413 8439236281 5783458143 2474746949 2519586524 1527267635 60715]
#KJ499917_Protosalanx_chinensis TATCATTCGA CCTCTGCATT TTCGTTACTA TGTGAGAATC CCAACGTCGT TGAATATTCT TCTTCCAGAA TGAGATGGCG CCAGA
#KP170510_Neosalanx_tangkahkeii CGCTCCCTAC GTAACATGCC CCTACCGGCG CCGACAGGCA TTGGTACTAC CAGGCGCCTC CTAATTG... .....
#MW291629_Protosalanx_chinensis ..... ACG CCCCTCCCTT TGGTT

[ 1111111111 1111111111 1111111111 1111111111 1111111111 1111111111 111111]
[ 5566666666 6666666666 6666666666 6666666666 6666666666 66666]
[ 9900000000 0000011111 1112222223 4444455555 5666677777 77778]
[ 8901112346 6778822368 9990023771 2378823566 7489900000 11158]
[ 3252392431 2052909339 7892969145 9010708936 6710523579 17853]
#KJ499917_Protosalanx_chinensis TTGCTTACC ATCTTAAATG TTTCTAACTC -CTTATGCGA CTTGTGATGT AGCAG
#KP170510_Neosalanx_tangkahkeii .....C AAGTGGTAGT T.ACCCTACG GACCCAGCAA CAAT-
#MW291629_Protosalanx_chinensis ACCTCCACTT CGACCCGTCC .....CT.C..... ....A
-----

```

The species name *Protosalanx hyalocranius* was used for the originally published mt genome KJ499917 [1]. However, *P. hyalocranius* is a synonym of *P. chinensis* [2]. Consequently, we use the species name *P. chinensis* for the mt genome KJ499917 to avoid any confusion. The *COI* (5585-5699), *ND4* (10173-11826), and *CR* (15622-16163) recombinant regions are highlighted in red bold. The recombinant regions are limited by flanking polymorphic sites and do not exactly correspond to the beginning and ending breakpoints detected by the program RDP4 [3]. Dots indicate nucleotide identity with the recombinant sequence (KJ499917). The hyphens represent deleted nucleotides. The numbers above the top sequence represent the position of segregating sites. Nucleotides are numbered from the beginning of the GenBank sequences (accession numbers see above).

## References

1. Lu, C.; Gu, Y.; Li, C.; Cheng, L.; Sun, X.; Tang, F. Complete mitochondrial genome of clearhead icefish *Protosalanx hyalocranius* (Salmoniformes: Salangidae). *Mitochondrial DNA* **2016**, *27*, 514–515, doi:10.3109/19401736.2014.905834.

2. Zhang, J.; Li, M.; Xu, M.; Takita, T.; Wei, F. Molecular phylogeny of icefish Salangidae based on complete mtDNA cytochrome b sequences, with comments on estuarine fish evolution. *Biol. J. Linn. Soc.* **2007**, *91*, 325–340.
3. Martin, D.P.; Murrell, B.; Golden, M.; Khoosal, A.; Muhire, B. RDP4: Detection and analysis of recombination patterns in virus genomes. *Virus Evol.* **2015**, *1*, vev003, doi: 10.1093/ve/vev003.
