# Supplementary material for: Recombinant Mitochondrial Genomes Reveal Recent Interspecific Hybridization between Invasive Salangid Fishes
Source: MDPI journal article supplement (doi:10.3390/life12050661), 2022-04-29
Supplement: s1 [file s1]

**Table S1. Alphabetical list of the species with GenBank accession numbers of the nucleotide sequences used in this study**

| Taxon                             | GenBank accession number | Reference |
|-----------------------------------|--------------------------|-----------|
| <i>Hemisalanx brachyrostralis</i> | KJ645979                 | [1]       |
| <i>Leucosoma chinensis</i>        | MW131880                 | [2]       |
| <i>Neosalanx anderssoni</i>       | HM106492                 | [3]       |
| <i>Neosalanx taihuensis</i>       | MH348204                 | [4]       |
| <i>Neosalanx taihuensis</i>       | MW291630                 | [5]       |
| <i>Neosalanx taihuensis</i>       | JX524196                 | [6]       |
| <i>Neosalanx tangkahkeii</i>      | KP170510                 | [7]       |
| <i>Osmerus dentex</i>             | MH370836                 | [8]       |
| <i>Plecoglossus altivelis</i>     | AB047553                 | [9]       |
| <i>Protosalanx chinensis</i>      | HM106494                 | [3]       |
| <i>Protosalanx hyalocranius</i>   | KJ499917                 | [10]      |
| <i>Protosalanx chinensis</i>      | KP306787                 | [11]      |
| <i>Protosalanx chinensis</i>      | MH330683                 | [12]      |
| <i>Protosalanx chinensis</i>      | MW291629                 | [5]       |
| <i>Retropinna retropinna</i>      | AP004108                 | [13]      |
| <i>Retropinna semoni</i>          | KX421784                 | [14]      |
| <i>Salangichthys microdon</i>     | AP004109                 | [13]      |
| <i>Salanx ariakensis</i>          | AP006231                 | [15]      |
| <i>Salanx ariakensis</i>          | KM517200                 | [16]      |
| <i>Salanx cuvieri</i>             | KJ645978                 | [17]      |

## References

1. Zhang, J.; Ding, M.; Qi, J.; Chen, H.; Zhang, B. Complete mitochondrial genome of *Hemisalanx brachyrostralis* (Osteichthyes: Salangidae). *Mitochondrial DNA Part A* **2016**, *27*, 836-837, doi: 10.3109/19401736.2014.919465.

2. Xiong, F.; Zhai, D.; Yu, J.; Chen, Y.; Wang, Y.; Liu, H. The complete mitochondrial genome of the Chinese noodlefish *Leucosoma chinensis* and phylogenetic analysis of Salangidae (Osteichthyes: Osmeriformes). *Mitochondrial DNA Part B* **2021**, *6*, 176-177, doi: 10.1080/23802359.2020.1860720
3. Li, J.; Xia, R.; McDowall, R.M.; Lopez, J.A.; Lei, G.; Fu, C. Phylogenetic position of the enigmatic *Lepidogalaxias salamandroides* with comment on the orders of lower euteleostean fishes. *Mol. Phylogenet. Evol.* **2010**, *57*, 932-936.
4. Wang, Y.; Wen, H.; Yao, J.; Sun, K.; Wang, W.; Liu, H.; Yang, D.; Zhang, F.; Xiong, F. Complete mitochondrial genome of the Salangid icefish *Neosalanx taihuensis* (Actinopterygii: Osmeriformes: Salangidae). *Mitochondrial DNA Part B* **2018**, *3*, 1040-1041, doi:10.1080/23802359.2018.1511840
5. Yang, Y.; Sui, Z.; Liu, K.; Liu, Y. The complete mitochondrial DNA sequence of Linyi large icefish (*Protosalanx chinensis*). GenBank submission: 10-MAY-2021. Unpublished.
6. Zhang, J.F.; Rui, C.F. The complete mitochondrial genome of *Neosalanx taihuensis* and its phylogenetic analysis. GenBank submission: 17-OCT-2012. Unpublished.
7. Zhong, L.; Wang, M.; Li, D.; Tang, S.; Zhang, T.; Bian, W.; Chen, X. Complete mitochondrial genome of Chinese icefish *Neosalanx tangkahkeii*s (Salmoniformes, Salangidae): comparison reveals *Neosalanx taihuensis* not a valid name. *Mitochondrial DNA Part A* **2016**, *27*, 3303-3305, doi: 10.3109/19401736.2015.1015014.
8. Balakirev, E.S.; Kravchenko, A.Yu.; Romanov, N.S.; Ayala, F.J. Complete mitochondrial genome of the Arctic rainbow smelt *Osmerus dentex* (Osmeriformes, Osmeridae). *Mitochondrial DNA Part B* **2018**, *3*, 881-882.
9. Ishiguro, N.; Miya, M.; Nishida, M. Complete mitochondrial DNA sequence of ayu *Plecoglossus altivelis*. *Fish. Sci.* **2001**, *67*, 474-481.
10. Lu, C.; Gu, Y.; Li, C.; Cheng, L.; Sun, X.; Tang, F. Complete mitochondrial genome of clearhead icefish *Protosalanx hyalocranius* (Salmoniformes: Salangidae). *Mitochondrial DNA Part A* **2016**, *27*, 514-515.

11. Fu, J.; Xue, T.; Li, J. Complete mitochondrial genome of large icefish, *Protosalanx chinensis* (Salmoniformes: Salangidae). GenBank submission: 2-MAR-2015 Unpublished.
12. Liu, Y.; Song, C.; Chen, J. The mitochondrial genome of clearhead icefish *Protosalanx chinensis* (Salmoniformes: Salangidae). *Mitochondrial DNA Part B* **2018**, *3*, 774-775, doi:10.1080/23802359.2018.1491335
13. Ishiguro, N.B.; Miya, M.; Nishida, M. Basal euteleostean relationships: a mitogenomic perspective on the phylogenetic reality of the 'Protacanthopterygii'. *Mol. Phylogenet. Evol.* **2003**, *27*, 476-488.
14. Schmidt, D.J.; Islam, R.; Hughes, J.M. Complete mitogenomes for two lineages of the Australian smelt, *Retropinna semoni* (Osmeriformes: Retropinnidae). *Mitochondrial DNA B Resources* **2016**, *1*, 615-616.
15. Ishiguro, N.B.; Miya, M.; Inoue, J.G.; Nishida, M. *Sundasalanx* (Sundasalangidae) is a progenetic clupeiform, not a closelyrelated group of salangids (Osmeriformes): mitogenomic evidence. *J. Fish Biol.* **2005**, *67*, 561-569.
16. Zhang, H.; Xian, W. The complete mitochondrial genome of the larvae *Salanx ariakensis* (Osmeriformes, Salangidae) from Yangtze estuary. *Mitochondrial DNA Part A* **2016**, *27*, 1902-1903, doi: 10.3109/19401736.2014.971278.
17. Ding, M.; Wang, Z.; Qi, J.; Zhang, B.; Zhang, J. Mitochondrial genome of the *Salanx cuvieri* (Osteichthyes: Salangidae). *Mitochondrial DNA* **2014**, *27*, 834-835, doi:10.3109/19401736.2014.919464
